# Supplementary material for: Submarine groundwater discharge interacts with creek geomorphology to affect eastern oyster Crassostrea virginica growth rates in a coastal Georgia creek
Source: PeerJ. 2023 Aug 4;11:e15837. doi: 10.7717/peerj.15837 (PMC10405797; doi:10.7717/peerj.15837)
Supplement: Supplemental Information 2 — Daily specific growth rate data for caged oysters placed at sites with different sedimentation conditions (high and low) and submarine groundwater discharge conditions (high and low). “Metadata” sheet contains metadata, and “Data” sheet contains the cage mean growth rates across the different treatments. [file peerj-11-15837-s002.xlsx]

## Sheet: metadata
Flux = groundwater treatment (high or low) using visual assessments, with high flux being sites with surface sheen on mud and rivulets, which were absent at low sites
Sed = sedimentation treatment (high or low) using site locations and creek geomorphology, with high sedimentation occuring on point bars and low sedimentation occuring on cut banks
Cage = cage location on the two-tiered PVC racks deployed in the field; bot is the bottom cage, placed at the sediment surface and top is the top cage placed at 10cm above the surface
SPG = daily specific growth rate, calulcated as the ln(cm^2) d^-1. values represent cage means of 5 oysters per cage

## Sheet: data
Flux	Sed	Cage	SPG
High	High	Top	0.00774
High	High	Top	0.00918
High	High	Top	0.00907
High	High	Top	0.00615
High	High	Top	0.0045
High	High	Top	0.00927
High	High	Bot	0.00879
High	High	Bot	0.00773
High	High	Bot	0.00693
High	High	Bot	0.00522
High	High	Bot	0.00761
High	High	Bot	0.00792
High	Low	Top	0.00417
High	Low	Top	0.0029
High	Low	Top	0.00352
High	Low	Top	0.00317
High	Low	Top	0.00191
High	Low	Top	0.00805
High	Low	Bot	0.0034
High	Low	Bot	0.00585
High	Low	Bot	0.00128
High	Low	Bot	0.00332
High	Low	Bot	0.00202
High	Low	Bot	0.00135
Low	High	Top	0.00817
Low	High	Top	0.00765
Low	High	Top	0.00624
Low	High	Top	0.00549
Low	High	Top	0.00384
Low	High	Top	0.00707
Low	High	Bot	0.00857
Low	High	Bot	0.00698
Low	High	Bot	0.00648
Low	High	Bot	0.00929
Low	High	Bot	0.00805
Low	High	Bot	0.0063
Low	Low	Top	0.00545
Low	Low	Top	0.00817
Low	Low	Top	0.00903
Low	Low	Top	0.0049
Low	Low	Top	0.0039
Low	Low	Top	0.00435
Low	Low	Bot	0.00431
Low	Low	Bot	0.00269
Low	Low	Bot	0.00634
Low	Low	Bot	0.00645
Low	Low	Bot	0.00374
Low	Low	Bot	0.0013
